# Supplementary material
Source: ML conference proceedings conference paper supplement (https://openaccess.thecvf.com/content/CVPR2026/html/Lee_Beyond_Whats_Shared_CVPR_2026_paper.html)
Supplement: Supplementary file 1 [file Lee_Beyond_Whats_Shared_CVPR_2026_supplemental.pdf]

# Beyond What’s Shared: Recovering Lost Unique Information from Intermediate Layers to Boost Multimodal Geo-Foundation Models

## Supplementary Material

### A. Additional Ablation Study

**Non-linear probing.** To show that BWS gains hold beyond linear probing, we repeat the evaluation using MLP probes with official train/val/test data splits [27] (Table 6).

Table 6. BWS benefits non-linear (MLP) probing.

| Method        | Country<br>(Classification) | Elevation<br>(Regression) |
|---------------|-----------------------------|---------------------------|
| GeoCLIP [67]  | 0.939                       | 0.869                     |
| GeoCLIP + BWS | <b>0.954</b>                | <b>0.875</b>              |
| SatCLIP [27]  | 0.961                       | 0.897                     |
| SatCLIP + BWS | <b>0.964</b>                | <b>0.901</b>              |

**Controlling for dimensionality.** Using GeoCLIP [67], we compress BWS embeddings via PCA to match the final-layer dimension and expand the final-layer embedding to the BWS dimension via random orthogonal transformations, adding no new information. Table 7 shows that compressed BWS outperforms the baseline while orthogonal expansion provides no benefit, indicating the gains are not solely from increased dimensionality.

Table 7. Learned linear probing with dimensionality control.

| Method                            | Avg. Performance |
|-----------------------------------|------------------|
| Final layer (baseline)            | 0.781            |
| BWS (PCA-compressed)              | 0.808            |
| Final layer (orthogonal-expanded) | 0.766            |
| BWS                               | <b>0.848</b>     |

**Layerwise modality-specific (unique) information analysis.** We define modality-specific information as information unique to one modality and not accessible from the other. As a proxy for how much each layer retains, we train a linear model to predict modality-specific targets from layer activations: raw coordinates (lon, lat) for the location encoder and per-band spectral means for the image encoder. Using the S2-100k [27] pretraining data, we probe each layer with a linear model and report  $R^2$  (Table 8). Both encoders show a declining trend with depth, further motivating fusing intermediate layers.

Table 8. Unique info recoverability ( $R^2$ ) decreases with depth.

| SatCLIP Encoder   | Early Layer | Middle Layer | Final Layer |
|-------------------|-------------|--------------|-------------|
| Location (coord.) | 0.827       | 0.787        | 0.774       |
| Image (spectral)  | 0.999       | 0.917        | 0.534       |

### Fusing all layerwise information from both encoders.

BWS can also be applied to SatCLIP’s own vision encoder without external models. Following RANGE [13], we retrieve vision features for downstream coordinates via softmax-weighted similarity between location and image embeddings. Table 9 shows that applying BWS to both encoders yields the strongest results.

Table 9. Applying BWS to both encoders.

| Method             | Cls. (↑)     | Reg. (↑)     | Overall (↑)  |
|--------------------|--------------|--------------|--------------|
| RANGE              | 0.921        | 0.747        | 0.822        |
| RANGE + BWS (loc.) | 0.942        | 0.752        | 0.833        |
| RANGE + BWS (both) | <b>0.950</b> | <b>0.790</b> | <b>0.859</b> |

### B. Broader Applicability of BWS

**Generalizing to broader domains.** We apply BWS across additional domains and modalities: (1) *medical imaging* with MedCLIP [71] (image-text), (2) *robotics* with TVL [18] (touch-vision-language), and (3) *natural sciences* with AstroM<sup>3</sup> [48] (photometry-spectra-metadata). In each case, BWS fuses intermediate layers within each modality-specific encoder, and the resulting representations are evaluated via linear probing. Table 10 shows consistent gains across domains.

Table 10. BWS benefits diverse contrastive models.

| Method  | Task                    | Avg. Performance<br><i>Baseline</i> | <b>+BWS</b>  |
|---------|-------------------------|-------------------------------------|--------------|
| MedCLIP | Medical Image-Text Cls. | 0.697                               | <b>0.717</b> |
| TVL     | Tactile Attribute Cls.  | 0.771                               | <b>0.797</b> |
| AstroM3 | Variable Star Cls.      | 0.820                               | <b>0.892</b> |

**Diversifying multimodality and downstreams.** To test whether BWS generalizes beyond vision-location settings, we pre-train SimCLR [9] with a ResNet50 [21] on paired Sentinel-1 (S1) and Sentinel-2 (S2) imagery from SEN12MS [52]. We evaluate via linear probing on GEO-Bench [31] (six classification, six segmentation tasks). Table 11 shows BWS improves both task types.

Table 11. BWS benefits both GEO-Bench [31] tasks.

| Method                    | Avg. Cls.    | Avg. Seg.    |
|---------------------------|--------------|--------------|
| SimCLR-RN50 (S1-S2)       | 0.573        | 0.312        |
| SimCLR-RN50 (S1-S2) + BWS | <b>0.700</b> | <b>0.461</b> |
